# Supplementary material for: The Influences of Rainfall Intensity and Timing on the Assemblage of Dung Beetles and the Rate of Dung Removal in an Alpine Meadow
Source: MDPI journal article supplement (doi:10.3390/biology12121496), 2023-12-06
Supplement: s1 [file s1]

# Supplementary Materials for

## The influences of rainfall intensity and timing on the assemblage of dung beetles and the rate of dung removal in an alpine meadow

Wenxiao Sun <sup>1</sup>, Wenting Tang <sup>1</sup>, Yashi Wu <sup>1</sup>, Shuaibing He <sup>1</sup>, Xinwei Wu <sup>1,\*</sup>

<sup>1</sup> Department of Ecology, College of Life Science, Nanjing University, Nanjing 210023, China

\* Correspondence: wuxw@nju.edu.cn; Tel.: 86-25-89681213

**Table S1.** The number of different beetle species in different treatments during the experiment period.

| Family       | Species                          | Heavy rainfall |     |     |     |     | Light rainfall |     |     |     |     |
|--------------|----------------------------------|----------------|-----|-----|-----|-----|----------------|-----|-----|-----|-----|
|              |                                  | 0              | 2   | 4   | 24  | 48  | 0              | 2   | 4   | 24  | 48  |
| Scarabaeidae | <i>Eupleurus subterraneus</i>    | 227            | 490 | 469 | 473 | 249 | 419            | 416 | 348 | 515 | 321 |
|              | <i>Aphodius rectus</i>           | 30             | 65  | 69  | 45  | 27  | 97             | 40  | 88  | 82  | 104 |
|              | <i>Aphodius prodromus</i>        | 16             | 19  | 16  | 14  | 7   | 27             | 16  | 25  | 40  | 37  |
|              | <i>Aphodius erraticus</i>        | 12             | 12  | 10  | 5   | 7   | 10             | 4   | 10  | 8   | 13  |
|              | <i>Aphodius depressus</i>        | 6              | 8   | 12  | 9   | 9   | 6              | 4   | 5   | 12  | 15  |
|              | <i>Aphodius alpinus</i>          | 2              | 0   | 0   | 1   | 1   | 0              | 0   | 0   | 1   | 0   |
|              | <i>Aphodius elegans</i>          | 0              | 3   | 5   | 7   | 1   | 6              | 7   | 3   | 2   | 2   |
|              | <i>Otophorus haemorrhoidalis</i> | 0              | 1   | 1   | 0   | 0   | 0              | 0   | 0   | 1   | 2   |
|              | <i>Onthophagus gibbulus</i>      | 0              | 0   | 1   | 1   | 0   | 0              | 1   | 0   | 0   | 1   |
|              | <i>Aphodius coniugatus</i>       | 0              | 0   | 0   | 2   | 2   | 0              | 1   | 0   | 2   | 0   |
|              | <i>Onthophagus uniformis</i>     | 0              | 0   | 0   | 0   | 0   | 0              | 0   | 1   | 1   | 1   |
| Geotrupidae  | <i>Geotrupes ibericus</i>        | 5              | 0   | 2   | 3   | 0   | 2              | 1   | 1   | 5   | 5   |
| Hydrophilide | <i>Cercyon assecla</i>           | 0              | 0   | 0   | 1   | 2   | 0              | 0   | 0   | 0   | 10  |
|              | <i>Cercyon pygmaeus</i>          | 0              | 0   | 0   | 0   | 0   | 1              | 1   | 0   | 0   | 0   |

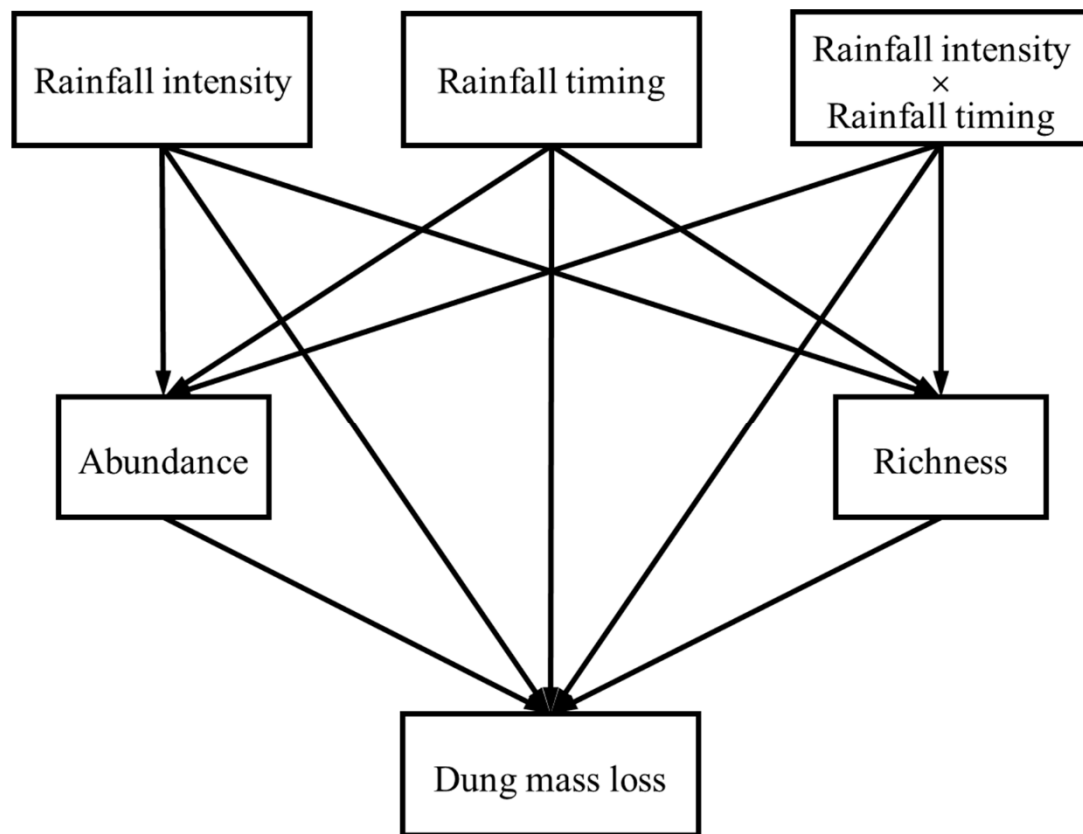

**Figure S1.** Diagram of possible pathways that rainfall patterns and dung beetles affect the dung mass loss. Rainfall patterns including rainfall intensity, timing and their interaction may directly affect the dung beetle assemblage (abundance and richness) and dung mass loss, and may also affect the dung mass loss by affecting the dung beetle assemblage. Dung beetle assemblage may also directly affect dung mass loss.
